# Supplementary material
Source: PubMed Central journal article supplement (PMC8827031)
Supplement: ocab277_Supplementary_Data.pdf [file ocab277_Supplementary_Data.pdf]

# Review, Assess, Classify and Evaluate (RACE): A Framework for Studying M-health Apps and its Application for Opioid Apps

## SUPPLEMENTARY MATERIAL

**Table A1. PRISMA Sources, Search Terms, and Outcome**

| Source to search for apps | Search terms                 | Number of apps found |
|---------------------------|------------------------------|----------------------|
| Google Play Store         | “Opioid” AND (“App OR Apps”) | 245                  |
| Apple iTunes Store        |                              | 33                   |
| Web of Science            |                              | 101                  |
| PubMed                    |                              | 52                   |
| IEEE Xplore               |                              | 0                    |
| ACM Digital Library       |                              | 0                    |
| AIS eLibrary              |                              | 1                    |
| <b>Total apps found</b>   |                              | <b>432</b>           |
